# Supplementary material for: Rapid deposition of two-dimensional antimonene films by thermal evaporation
Source: Royal Society of Chemistry journal article supplement (doi:10.1039/d4ce00343h), 2024-01-01
Supplement: d4ce00343h1.pdf [file d4ce00343h1.pdf]

**Supplementary Information for**

**Rapid deposition of two-dimensional antimonene films by  
thermal evaporation**

Jun Zhou<sup>#,\*</sup>, Wanting Xu<sup>#</sup>, Huiyan Guan, Miao Zhang, Chuanlin Liu, Guiming He,  
Dingli Guo

Key Laboratory of Quantum Materials and Devices of Ministry of Education, School  
of Physics, Southeast University, Nanjing 211189, China;

<sup>#</sup>These authors contributed equally: Jun Zhou, Wanting Xu;

\*e-mail: [17816123416@163.com](mailto:17816123416@163.com).

## **Table of contents**

**Supplementary Figure 1** Thermal evaporation of Sb on different substrates.

**Supplementary Figure 2** Thickness of Sb thermally evaporated onto WS<sub>2</sub>.

**Supplementary Figure 3** Structural characterization of thin films formed by Sb deposition on WS<sub>2</sub> with increasing thermal evaporation time at 590°C heating temperature, height h = 5 cm.

**Supplementary Figure 4** Preparation of 2D antimonene on WS<sub>2</sub> by vapor deposition.

**Supplementary Figure 5** Thermal evaporation of different materials on a single layer of WS<sub>2</sub>.

**Supplementary Figure 6** Thermal evaporation of tellurium dioxide films on SiO<sub>2</sub>.

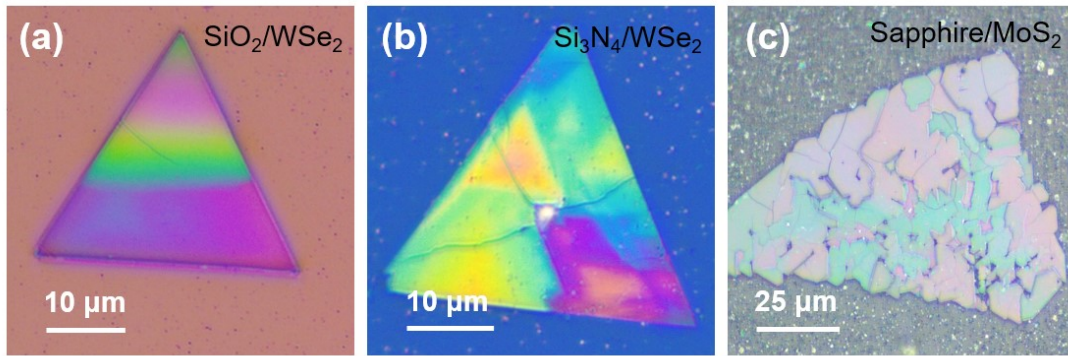

**Supplementary Figure 1 Thermal evaporation of Sb on different substrates.** Optical images of Sb thermal evaporation deposition on different substrates at a distance of 0 cm between the substrate and the porcelain boat, a heating temperature of 590 °C and a heating time of 120 s. (a) SiO<sub>2</sub>/WSe<sub>2</sub>, (b) Si<sub>3</sub>N<sub>4</sub>/WSe<sub>2</sub>, (c) Sapphire/MoS<sub>2</sub>.

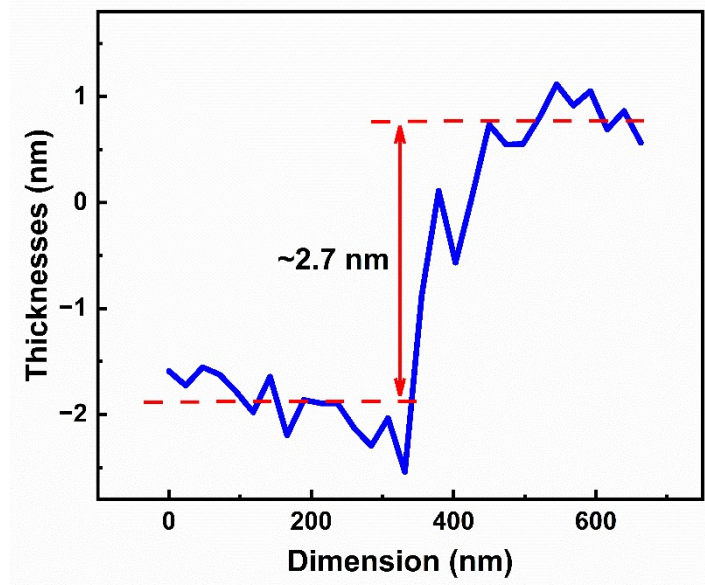

**Supplementary Figure 2 Thickness of Sb thermally evaporated onto WS<sub>2</sub>.** The heating temperature was 590°C and the heating height was 5 cm.

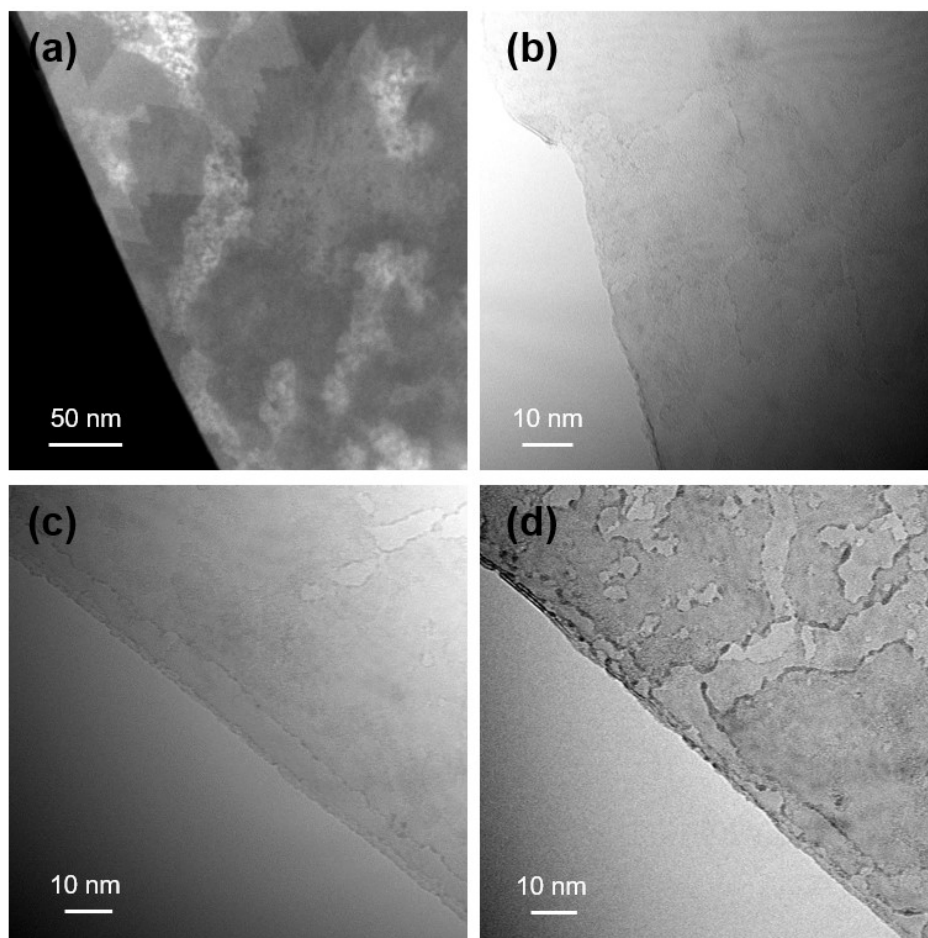

**Supplementary Figure 3 Structural characterization of thin films formed by Sb deposition on WS<sub>2</sub> with increasing thermal evaporation time at 590°C heating temperature, height h = 5 cm.** (a) Low-magnification TEM image at 10 s thermal evaporation time. (b) Low-magnification TEM image at 30 s thermal evaporation time. (c) Low-magnification TEM image at 60 s thermal evaporation time. (d) Low power TEM image of the sample after electron beam irradiation at 60 s thermal evaporation time.

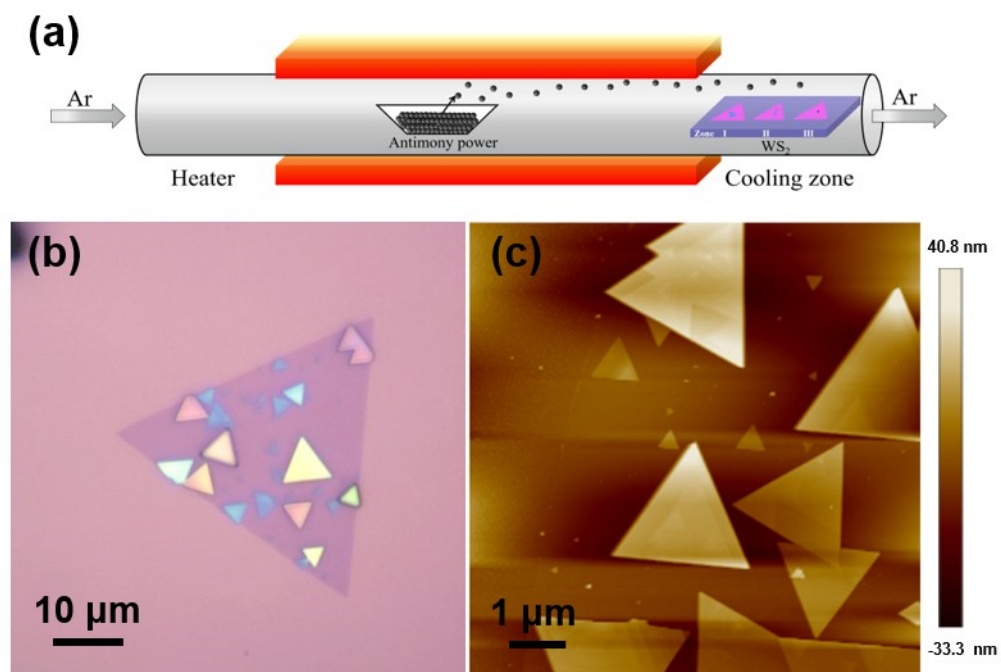

**Supplementary Figure 4 Preparation of 2D antimonene on WS<sub>2</sub> by vapor deposition.**

(a) Schematic of growth. (b) Optical image of antimonene grown on WS<sub>2</sub>. (c) AFM image of antimonene grown on WS<sub>2</sub>.

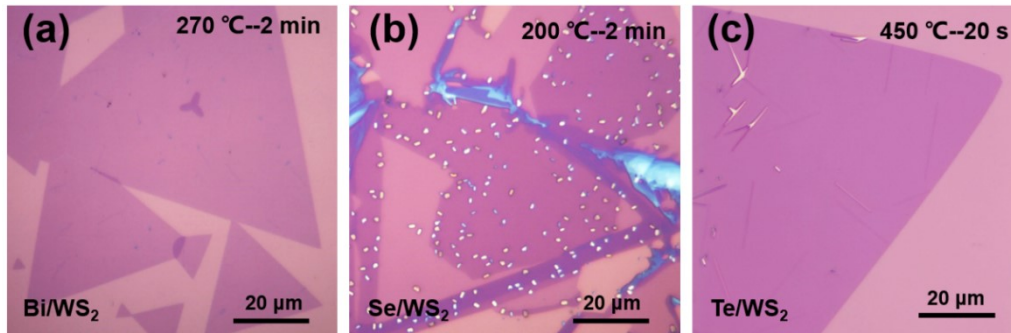

**Supplementary Figure 5 Thermal evaporation of different materials on a single layer of WS<sub>2</sub>.** (a) thermal evaporation of Bi nanowires at 270 °C and 2 min heating condition; (b) thermal evaporation of Se nanosheets at 200 °C and 2 min heating condition; (c) thermal evaporation of Te nanowires at 450 °C and 20 s heating condition.

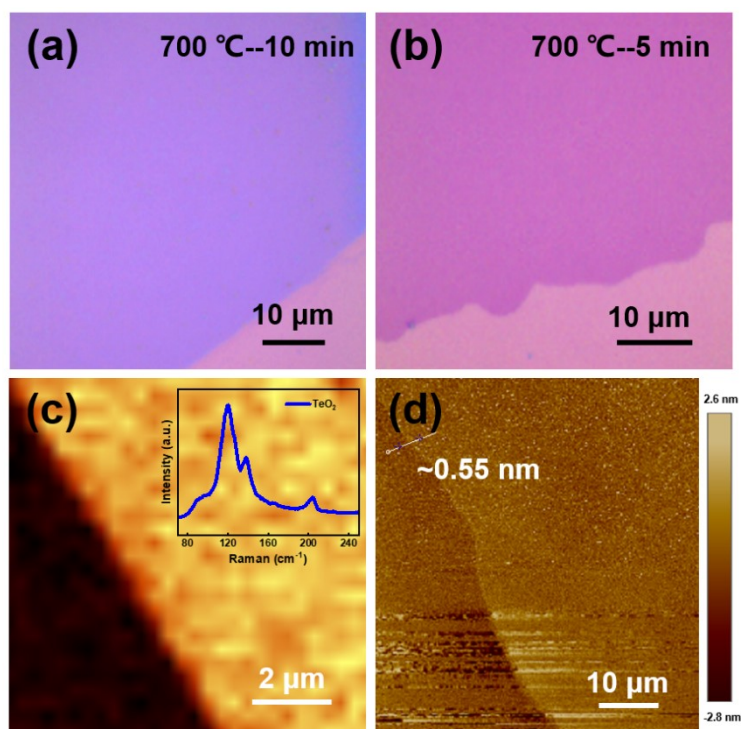

**Supplementary Figure 6 Thermal evaporation of tellurium dioxide films on SiO<sub>2</sub>.** (a- b) Optical microscope maps of thin film deposition of TeO<sub>2</sub> at 700 °C with different thermal evaporation times: (a) 10 min; (b) 5 min. (c) Raman mapping of TeO<sub>2</sub>, and the inset shows the Raman characteristic spectrum of TeO<sub>2</sub>. (d) AFM of TeO<sub>2</sub> films obtained by thermal evaporation deposition.
